# Supplementary material
Source: Elsevier journal article supplement (https://www.sciencedirect.com/science/article/pii/S234128792100154X)
Supplement: mmc1 [file S234128792100154X:mmc1.pdf]

## ANEXO 1. Cuestionario entrevistas telefónicas:

1. ID: \_\_\_\_\_

Fecha: \_\_\_\_/\_\_\_\_/\_\_\_\_

Fecha inicio síntomas:

Fecha primera consulta en urgencias:

Fecha ingreso hospitalario y alta:

Tratamiento actual domiciliario:

|                           |    |    |                                               |
|---------------------------|----|----|-----------------------------------------------|
| FIEBRE                    | SI | NO | Inicio (____/____/____), Fin (____/____/____) |
| RINORREA                  | SI | NO | Inicio (____/____/____), Fin (____/____/____) |
| DOLOR DE GARGANTA         | SI | NO | Inicio (____/____/____), Fin (____/____/____) |
| TOS                       | SI | NO | Inicio (____/____/____), Fin (____/____/____) |
| DISNEA                    | SI | NO | Inicio (____/____/____), Fin (____/____/____) |
| DIARREA                   | SI | NO | Inicio (____/____/____), Fin (____/____/____) |
| VÓMITOS                   | SI | NO | Inicio (____/____/____), Fin (____/____/____) |
| DOLOR ABDOMINAL           | SI | NO | Inicio (____/____/____), Fin (____/____/____) |
| CEFALEA                   | SI | NO | Inicio (____/____/____), Fin (____/____/____) |
| PÉRDIDA OLFATO/GUSTO      | SI | NO | Inicio (____/____/____), Fin (____/____/____) |
| ASTENIA                   | SI | NO | Inicio (____/____/____), Fin (____/____/____) |
| MIALGIAS                  | SI | NO | Inicio (____/____/____), Fin (____/____/____) |
| EXANTEMA                  | SI | NO | Inicio (____/____/____), Fin (____/____/____) |
| OTROS (especificar:_____) |    |    | Inicio (____/____/____), Fin (____/____/____) |

OTROS COMENTARIOS:

RECOMENDACIÓN:
